# Supplementary material for: Habits of Good Medical Students - A Qualitative Analysis of What Students Attribute to their Success Professionally and Academically
Source: Research Square preprint supplement (doi:10.21203/rs.3.rs-6371871/v1), 2025-06-17
Supplement: Supplementary file 1 [file b152717fba280f42b25d5e65.docx]

Appendix A: Qualtrics Survey

Intro Title & Text: AY23-24 Student Study Habits

We are exploring which habits students think are helpful to promote in year 1 of

the medical school program for future success. Reflecting back on your year 1 experience to date:

Questions:

What top 1-3 habits would be helpful to promote in year 1 for your academic success?


What top 1-3 habits would be helpful to promote in year for your professional Identity development?
